# Supplementary material for: Defects in mating behavior and tail morphology are the primary cause of sterility in C. elegans males at high temperature
Source: Oxford University Press journal article supplement (doi:10.1242/jeb.208041), 2019-01-01
Supplement: jeb208041supp.pdf [file jeb208041supp.pdf]

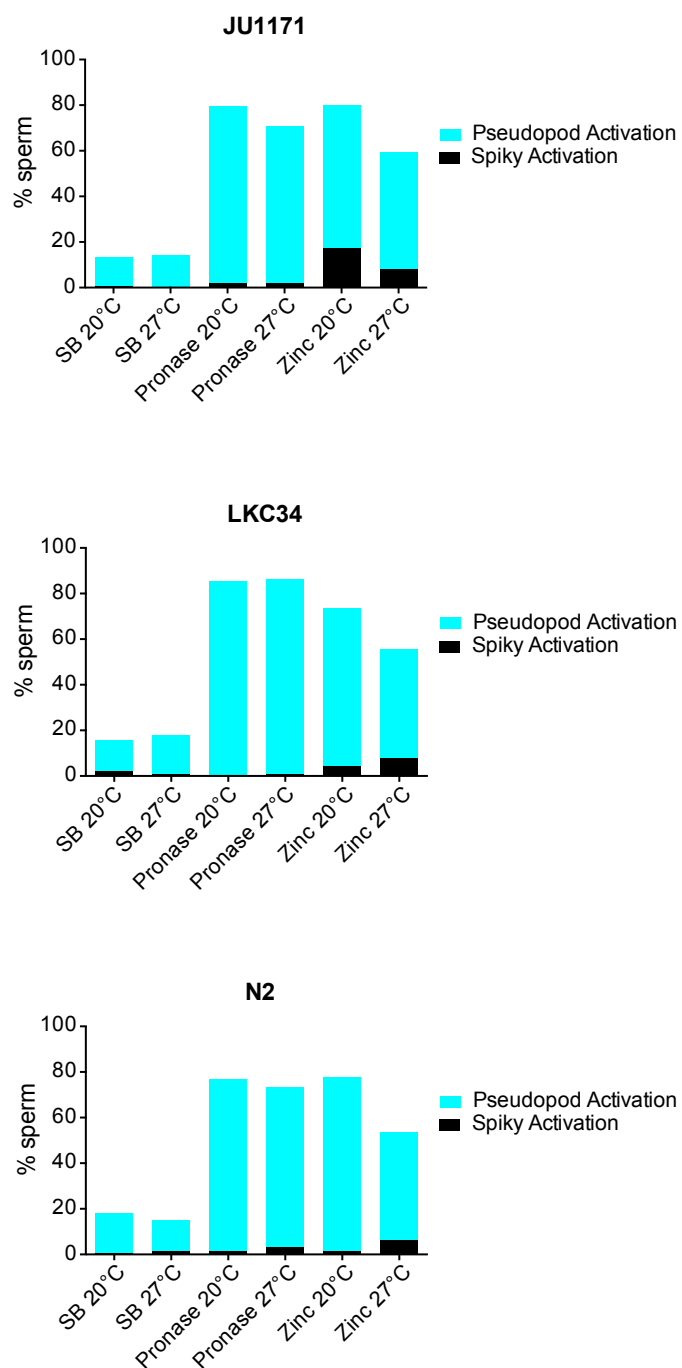

**Figure S1:** The percentage of activated sperm that have spikes is not significantly increased at 27°C. *In vitro* sperm activation using two different activators was measured for males raised at 20°C or 27°C. Activated sperm were scored as having spikes or pseudopods.

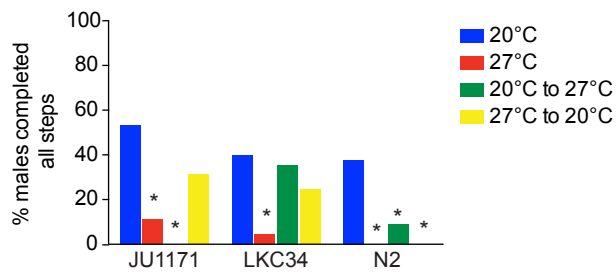

**Figure S2:** Males raised 27°C continuously fail to complete mating more often than males raised at 20°C. As each step in the mating assay can result in the loss of a male from the mating process, we calculated the percentage of males that completed all steps successfully. LKC34 was the most temperature insensitive in this assay only showing a decreased percentage of males completing mating when males were raised continuously at 27°C. N2 was the most temperature sensitive showing decreased percentage of males completing mating with any exposure to elevated temperature ( $p < 0.05$ , Fisher's exact test).

**Table S1: Percentage of activated sperm**

|               | % round spermatids (n) | % sperm w/ pseudopods (n) | % sperm w/ spikes(n) | Total Sperm |
|---------------|------------------------|---------------------------|----------------------|-------------|
| <b>JU1171</b> |                        |                           |                      |             |
| SB 20°C       | 86.9 (932)             | 12.5 (134)                | 0.6 (7)              | 1073        |
| SB 27°C       | 85.9 (201)             | 13.7 (32)                 | 0.4 (1)              | 234         |
| Pronase 20°C  | 20.5 (102)             | 77.5 (386)                | 2.0 (10)             | 498         |
| Pronase 27°C  | 29.4 (89)              | 68.6 (208)                | 2.0 (6)              | 303         |
| Zinc 20°C     | 20.0 (219)             | 62.8 (688)                | 17.2 (188)           | 1095        |
| Zinc 27°C     | 40.8 (361)             | 50.9 (450)                | 8.3 (73)             | 884         |
| <b>LKC34</b>  |                        |                           |                      |             |
| SB 20°C       | 84.4 (562)             | 13.5 (90)                 | 2.1 (14)             | 666         |
| SB 27°C       | 81.9 (730)             | 17.3 (154)                | 0.8 (7)              | 891         |
| Pronase 20°C  | 14.6 (64)              | 84.9 (372)                | 0.5 (2)              | 438         |
| Pronase 27°C  | 13.7 (106)             | 85.6 (661)                | 0.7 (5)              | 772         |
| Zinc 20°C     | 26.7 (336)             | 69.2 (871)                | 4.1 (51)             | 1258        |
| Zinc 27°C     | 44.3 (166)             | 48.0 (180)                | 7.7 (29)             | 375         |
| <b>N2</b>     |                        |                           |                      |             |
| SB 20°C       | 82.2 (619)             | 17.1 (129)                | 0.7 (5)              | 753         |
| SB 27°C       | 85.2 (621)             | 13.4 (98)                 | 1.4 (39)             | 728         |
| Pronase 20°C  | 23.3 (107)             | 75.2 (346)                | 1.5 (7)              | 460         |
| Pronase 27°C  | 26.9 (319)             | 69.8 (828)                | 3.9 (39)             | 1186        |
| Zinc 20°C     | 22.3 (236)             | 76.3 (806)                | 1.4 (15)             | 1057        |
| Zinc 27°C     | 46.4 (510)             | 47.27 (520)               | 6.36 (70)            | 1100        |

**Table S2: Percentage of males that completed mating versus transferred sperm**

| Strain and assay   | % males in each temperature treatment |          |             |               |
|--------------------|---------------------------------------|----------|-------------|---------------|
|                    | 20°C (n)                              | 27°C (n) | upshift (n) | downshift (n) |
| <b>JU1171</b>      |                                       |          |             |               |
| Completed Mating** | 53.3 (24)                             | 11.1 (5) | 0.0 (0)     | 31.1 (14)     |
| Inseminated        | 62.0 (31)                             | 5.0 (2)  | 0.0 (0)     | 0.0* (0)      |
| <b>LKC34</b>       |                                       |          |             |               |
| Completed Mating** | 40.0 (24)                             | 4.4 (2)  | 35.6 (16)   | 24.4 (11)     |
| Inseminated        | 38.0 (19)                             | 0.0 (0)  | 13.33* (4)  | 0.0* (0)      |
| <b>N2</b>          |                                       |          |             |               |
| Completed Mating** | 37.8 (17)                             | 0.0 (0)  | 8.9 (4)     | 0.0 (0)       |
| Inseminated***     | 46.0 (23)                             | 5.0 (2)  | 3.33 (1)    | 0.0 (0)       |

\*  $p < 0.05$  Fisher's exact test between the number of male that completed mating and transferred sperm in a given strain at a given temperature

\*\* Total number of males scored in mating experiments was 45 except for LKC34 at 20°C which was 60 males.

\*\*\* Total number of males scored in transfer experiments was 50.
